# Supplementary material
Source: Springer Nature journal article supplement (https://www.springermedizin.de/resource/supplementary/12891_2011_1442_MOESM5_ESM.pdf/9508260)

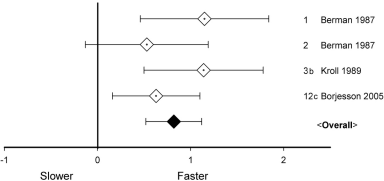

Supplement: MOESM5 [file 9508260]
